# Supplementary material for: Multisensory Learning of Socio-Emotional Skills: Linking Emotion Confusion to Behavioral Outcomes in Schools
Source: Research Square preprint supplement (doi:10.21203/rs.3.rs-7133079/v1), 2025-07-22
Supplement: Supplementary file 1 [file Appendix.docx]

Appendix

| **Variabile** | **N** | **Min** | **Max** | **Media** | **Dev. Std.** | **Skewness** | **Curtosi** | **Test Normality** | **P. Value** | **Trasformation** |
| --- | --- | --- | --- | --- | --- | --- | --- | --- | --- | --- |
| Total confusion | 41 | 5.00 | 29.00 | 14.61 | 5.48 | 0.63 | 3.12 | S.-W. | 0.1554 | None |
| Subscale confusion felicità | 41 | 0.00 | 8.00 | 1.15 | 1.48 | 2.58 | 12.34 | S.-W. | <.05 | None |
| Subscale confusion tristezza | 41 | 0.00 | 10.00 | 3.59 | 2.64 | 0.79 | 2.54 | S.-W. | 0.051 | Yeo-Johnson |
| Subscale confusion rabbia | 41 | 2.00 | 11.00 | 5.61 | 2.49 | 0.26 | 2.22 | S.-W. | 0.0582 | None |
| Subscale confusion paura | 41 | 0.00 | 12.00 | 4.27 | 3.14 | 0.98 | 3.24 | S.-W. | 0.2088 | log10(x + c) |
| Paralanguage confusion Total Score | 41 | 6.0 | 10.0 | 10.0 | 1.98 | 0.23 | -0.25 | S.-W. | >.05 | None |
| Adult Paralanguage | 41 | 2.0 | 8.0 | 4.75 | 1.42 | 0.33 | -0.65 | S.-W. | >.05 | Box-Cox |
| Child Paralanguage | 41 | 2.0 | 8.0 | 5.34 | 1.66 | -0.22 | -0.53 | S.-W. | <.05 | None |
| Sdq | 41 | 7.00 | 30.00 | 15.93 | 5.62 | 0.90 | 3.55 | S.-W. | 0.5822 | Box-Cox |
| Emotional problems scale | 41 | 0.00 | 3.00 | 0.73 | 0.98 | 0.88 | 2.35 | S.-W. | <.05 | None |
| Conduct problems scale | 41 | 0.00 | 8.00 | 2.49 | 2.09 | 0.92 | 2.94 | S.-W. | <.05 | None |
| Hyperactivity scale | 41 | 0.00 | 5.00 | 1.59 | 1.22 | 0.75 | 3.40 | S.-W. | <.05 | None |
| Peer problems scale | 41 | 16.00 | 53.00 | 30.66 | 9.13 | 0.65 | 2.87 | S.-W. | 0.0780 | None |
| Prosocial scale | 41 | 0.00 | 9.00 | 3.32 | 2.03 | 0.32 | 2.83 | S.-W. | 0.0595 | None |

Table 2. Descriptive and Variables Normality testing and descriptive for group distribution (only subtotal variables).

| **Gruppo** | **Variable** | **N** | **Min** | **Max** | **Media** | **Dev. Std.** | **Skewness** | **Curtosi** |
| --- | --- | --- | --- | --- | --- | --- | --- | --- |
| Non Clinico | TOTAL CONFUSION | 20 | 5 | 24 | 12.90 | 4.51 | 0.37 | 3.16 |
| Non Clinico | SDQ | 20 | 7 | 16 | 11.80 | 2.57 | -0.02 | 1.97 |
| Clinico | TOTAL CONFUSION | 20 | 6 | 29 | 16.50 | 5.95 | 0.42 | 2.48 |
| Clinico | SDQ | 20 | 15 | 30 | 20.10 | 4.87 | 1.02 | 2.84 |
| Maschi | TOTAL CONFUSION | 21 | 6 | 27 | 15.33 | 5.58 | 0.40 | 2.35 |
| Maschi | SDQ | 21 | 10 | 30 | 16.76 | 6.04 | 0.63 | 2.27 |
| Femmine | TOTAL CONFUSION | 19 | 5 | 29 | 14.21 | 5.70 | 0.45 | 2.94 |
| Femmine | SDQ | 19 | 7 | 29 | 15.95 | 5.59 | 0.68 | 2.57 |

|  | **TOTAL_CONFUSION** | **SUBSCALE_FELICITA** | **SUBSCALE_TRISTEZZA** | **SUBSCALE_RABBIA** | **SUBSCALE_PAURA** | **TOTAL_PARALANGUAGE** | **ADULT_PARALANGUAGE** | **CHILD_PARALANGUAGE** | **SDQ** | **EMOTIONAL** | **CONDUCT** | **HYPERACTIVITY** | **PEER_PROBLEMS** | **PROSOCIAL** |
| --- | --- | --- | --- | --- | --- | --- | --- | --- | --- | --- | --- | --- | --- | --- |
| **TOTAL_CONFUSION** | - | 0.38* | 0.69*** | 0.46** | 0.63*** | -0.11 | -0.01 | -0.17 | 0.33* | 0.33* | 0.50*** | 0.45** | 0.81*** | 0.55*** |
| **SUBSCALE_FELICITA** | 0.38* | - | 0.14 | -0.10 | 0.15 | 0.30 | 0.11 | 0.25 | -0.12 | 0.31 | 0.26 | 0.19 | 0.16 | 0.06 |
| **SUBSCALE_TRISTEZZA** | 0.69*** | 0.14 | - | 0.20 | 0.13 | -0.29 | -0.12 | -0.28 | 0.55*** | 0.38* | 0.08 | 0.29 | 0.76*** | 0.44** |
| **SUBSCALE_RABBIA** | 0.46** | -0.10 | 0.20 | - | -0.11 | -0.21 | -0.08 | -0.16 | 0.18 | -0.14 | 0.29 | -0.05 | 0.39* | 0.33* |
| **SUBSCALE_PAURA** | 0.63*** | 0.15 | 0.13 | -0.11 | - | 0.08 | 0.09 | -0.05 | 0.02 | 0.21 | 0.46** | 0.49** | 0.40** | 0.30 |
| **TOTAL_PARALANGUAGE** | -0.11 | 0.30 | -0.29 | -0.21 | 0.08 | - | 0.56*** | 0.66*** | -0.33* | -0.03 | 0.05 | -0.11 | -0.27 | -0.12 |
| **ADULT_PARALANGUAGE** | -0.01 | 0.11 | -0.12 | -0.08 | 0.09 | 0.56*** | - | -0.12 | -0.01 | -0.07 | -0.00 | -0.04 | -0.01 | 0.07 |
| **CHILD_PARALANGUAGE** | -0.17 | 0.25 | -0.28 | -0.16 | -0.05 | 0.66*** | -0.12 | - | -0.35* | -0.02 | 0.06 | -0.11 | -0.32* | -0.16 |
| **SDQ** | 0.33* | -0.12 | 0.55*** | 0.18 | 0.02 | -0.33* | -0.01 | -0.35* | - | 0.09 | -0.20 | 0.24 | 0.81*** | 0.16 |
| **EMOTIONAL** | 0.33* | 0.31 | 0.38* | -0.14 | 0.21 | -0.03 | -0.07 | -0.02 | 0.09 | - | 0.09 | -0.01 | 0.26 | 0.18 |
| **CONDUCT** | 0.50*** | 0.26 | 0.08 | 0.29 | 0.46** | 0.05 | -0.00 | 0.06 | -0.20 | 0.09 | - | 0.16 | 0.18 | 0.30 |
| **HYPERACTIVITY** | 0.45** | 0.19 | 0.29 | -0.05 | 0.49** | -0.11 | -0.04 | -0.11 | 0.24 | -0.01 | 0.16 | - | 0.43** | -0.10 |
| **PEER_PROBLEMS** | 0.81*** | 0.16 | 0.76*** | 0.39* | 0.40** | -0.27 | -0.01 | -0.32* | 0.81*** | 0.26 | 0.18 | 0.43** | - | 0.43** |
| **PROSOCIAL** | 0.55*** | 0.06 | 0.44** | 0.33* | 0.30 | -0.12 | 0.07 | -0.16 | 0.16 | 0.18 | 0.30 | -0.10 | 0.43** | - |
