# Supplementary material for: Multisensory Learning of Socio-Emotional Skills: Linking Emotion Confusion to Behavioral Outcomes in Schools
Source: Research Square preprint supplement (doi:10.21203/rs.3.rs-7133079/v1), 2025-07-22
Supplement: Supplementary file 2 [file Code.docx]

Code appendix and data results

DATA EXTRACTION

a = xlsread("Nor.xlsx",'A2:A42');

b = xlsread("Nor.xlsx",'B2:B42');

c = xlsread("Nor.xlsx",'C2:C42');

d = xlsread("Nor.xlsx",'D2:D42');

e = xlsread("Nor.xlsx",'E2:E42');

f = xlsread("Nor.xlsx",'F2:F42');

g = xlsread("Nor.xlsx",'G2:G42');

h = xlsread("Nor.xlsx",'H2:H42');

i = xlsread("Nor.xlsx",'I2:I42');

j = xlsread("Nor.xlsx",'J2:J42');

k = xlsread("Nor.xlsx",'K2:K42');

NORMALITY TESTING

[H, pValue, W] = swtest(a)

H =

[**logical**](about:blank)

0

pValue =

0.1554

W =

0.9615

[H, pValue, W] = swtest(d)

H =

[**logical**](about:blank)

0

pValue =

0.0582

W =

0.9477

[H, pValue, W] = swtest(j)

H =

[**logical**](about:blank)

0

pValue =

0.0780

W =

0.9513

[H, pValue, W] = swtest(k)

H =

[**logical**](about:blank)

0

pValue =

0.0595

W =

0.9480

f1 = boxcox(f);

[H, pValue, W] = swtest(f1)

H =

[**logical**](about:blank)

0

pValue =

0.5822

W =

0.9775

if min(e) <= 0

c = abs(min(e)) + 1;

else

c = 0;

end

e_log10 = log10(e + c);

[H, pValue, W] = swtest(e_log10)

H =

[**logical**](about:blank)

0

pValue =

0.2088

W =

0.9635

PYTHON TRASFORMATION FOR C VARIABLE

import numpy as np

import pandas as pd

import matplotlib.pyplot as plt

import scipy.stats as stats

from sklearn.preprocessing import PowerTransformer

# Dati della sottoscala "Confusione Tristezza"

confusione_tristezza = np.array([

2, 4, 5, 2, 2, 4, 4, 1, 2, 1,

2, 2, 0, 6, 1, 4, 10, 7, 6, 1,

1, 9, 2, 4, 2, 0, 3, 3, 2, 6,

8, 1, 2, 3, 8, 2, 2, 8, 7, 2, 6

]).reshape(-1, 1)

# Trasformazione Yeo-Johnson

pt = PowerTransformer(method='yeo-johnson', standardize=True)

tristezza_trasformata = pt.fit_transform(confusione_tristezza)

shapiro_test = stats.shapiro(tristezza_trasformata)

print("Shapiro-Wilk p-value:", shapiro_test.pvalue)

print("Lambda stimato (Yeo-Johnson):", pt.lambdas_[0])

p-value ≈ 0.051

Confusione_Tristezza_Trasformata

‘-0.4726911489036446

0.3970797422732352

0.7218399345735924

-0.4726911489036446

-0.4726911489036446

0.3970797422732352

0.3970797422732352

-1.1229150695872063

-0.4726911489036446

-1.1229150695872063

-0.4726911489036446

-0.4726911489036446

-2.1577416279072374

1.0025203956146063

-1.1229150695872063

0.3970797422732352

1.8588505117068463

1.2502678041287465

1.0025203956146063

-1.1229150695872063

-1.1229150695872063

1.6740453574762544

-0.4726911489036446

0.3970797422732352

-0.4726911489036446

-2.1577416279072374

0.009989549999147654

0.009989549999147654

-0.4726911489036446

1.0025203956146063

1.4724127510829539

-1.1229150695872063

-0.4726911489036446

0.009989549999147654

1.4724127510829539

-0.4726911489036446

-0.4726911489036446

1.4724127510829539

1.2502678041287465

-0.4726911489036446

1.0025203956146063’

c1 = [

-0.4726911489036446;

0.3970797422732352;

0.7218399345735924;

-0.4726911489036446;

-0.4726911489036446;

0.3970797422732352;

0.3970797422732352;

-1.1229150695872063;

-0.4726911489036446;

-1.1229150695872063;

-0.4726911489036446;

-0.4726911489036446;

-2.1577416279072374;

1.0025203956146063;

-1.1229150695872063;

0.3970797422732352;

1.8588505117068463;

1.2502678041287465;

1.0025203956146063;

-1.1229150695872063;

-1.1229150695872063;

1.6740453574762544;

-0.4726911489036446;

0.3970797422732352;

-0.4726911489036446;

-2.1577416279072374;

0.009989549999147654;

0.009989549999147654;

-0.4726911489036446;

1.0025203956146063;

1.4724127510829539;

-1.1229150695872063;

-0.4726911489036446;

0.009989549999147654;

1.4724127510829539;

-0.4726911489036446;

-0.4726911489036446;

1.4724127510829539;

1.2502678041287465;

-0.4726911489036446;

1.0025203956146063

];

DATA EXTRATION WITH TRASFORMED VALUE

data = [a b c1 d e_log10 f1 g h i j k];

DATA EXTRATION FOR DESCRIPTIVE

data_x = [a b c d e f g h i j k];

DESCRIPTIVE

[valori_unici, ~, idx] = unique(data_x);

frequenze = accumarray(idx, 1);

disp('Frequenze:');

disp(table(valori_unici, frequenze, 'VariableNames', {'Valore', 'Frequenza'}));

min_val = min(data_x);

max_val = max(data_x);

media = mean(data_x);

dev_std = std(data_x);

asimmetria = skewness(data_x);

kurt = kurtosis(data_x);

fprintf('\nStatistiche descrittive:\n');

fprintf('Minimo: %.2f\n', min_val);

fprintf('Massimo: %.2f\n', max_val);

fprintf('Media: %.2f\n', media);

fprintf('Deviazione standard: %.2f\n', dev_std);

fprintf('Asimmetria (Skewness): %.2f\n', asimmetria);

fprintf('Curtosi (Kurtosis): %.2f\n', kurt);

Frequenze:

**Valore** **Frequenza**

**______** **_________**

0 60

1 60

2 70

3 37

4 24

5 22

6 25

7 12

8 7

9 13

10 9

11 12

12 7

13 2

14 5

15 12

16 7

17 3

18 5

19 6

20 6

21 2

22 5

23 2

24 1

25 4

26 3

27 1

28 1

29 3

30 7

31 2

32 2

33 3

35 2

38 1

40 1

41 1

43 1

44 1

45 2

52 1

53 1

Statistiche descrittive:

Minimo: 5.00

Minimo: 0.00

Minimo: 0.00

Minimo: 2.00

Minimo: 0.00

Minimo: 7.00

Minimo: 0.00

Minimo: 0.00

Minimo: 0.00

Minimo: 16.00

Minimo: 0.00

Massimo: 29.00

Massimo: 8.00

Massimo: 10.00

Massimo: 11.00

Massimo: 12.00

Massimo: 30.00

Massimo: 3.00

Massimo: 8.00

Massimo: 5.00

Massimo: 53.00

Massimo: 9.00

Media: 14.61

Media: 1.15

Media: 3.59

Media: 5.61

Media: 4.27

Media: 15.93

Media: 0.73

Media: 2.49

Media: 1.59

Media: 30.66

Media: 3.32

Deviazione standard: 5.48

Deviazione standard: 1.48

Deviazione standard: 2.64

Deviazione standard: 2.49

Deviazione standard: 3.14

Deviazione standard: 5.62

Deviazione standard: 0.98

Deviazione standard: 2.09

Deviazione standard: 1.22

Deviazione standard: 9.13

Deviazione standard: 2.03

Asimmetria (Skewness): 0.63

Asimmetria (Skewness): 2.58

Asimmetria (Skewness): 0.79

Asimmetria (Skewness): 0.26

Asimmetria (Skewness): 0.98

Asimmetria (Skewness): 0.90

Asimmetria (Skewness): 0.88

Asimmetria (Skewness): 0.92

Asimmetria (Skewness): 0.75

Asimmetria (Skewness): 0.65

Asimmetria (Skewness): 0.32

Curtosi (Kurtosis): 3.12

Curtosi (Kurtosis): 12.34

Curtosi (Kurtosis): 2.54

Curtosi (Kurtosis): 2.22

Curtosi (Kurtosis): 3.24

Curtosi (Kurtosis): 3.55

Curtosi (Kurtosis): 2.35

Curtosi (Kurtosis): 2.94

Curtosi (Kurtosis): 3.40

Curtosi (Kurtosis): 2.87

Curtosi (Kurtosis): 2.83

CORRELATIONAL ANALYSIS

R =

1.0000 0.3781 0.6577 0.4595 0.6692 0.3004 0.3260 0.5022 0.4484 0.8149 0.5483

0.3781 1.0000 0.0798 -0.0998 0.1137 -0.1029 0.3059 0.2603 0.1866 0.1579 0.0592

0.6577 0.0798 1.0000 0.2078 0.2644 0.5179 0.4208 0.0627 0.2635 0.7306 0.4727

0.4595 -0.0998 0.2078 1.0000 -0.0340 0.1698 -0.1369 0.2878 -0.0462 0.3903 0.3319

0.6692 0.1137 0.2644 -0.0340 1.0000 0.0757 0.2630 0.3682 0.4893 0.4748 0.3121

0.3004 -0.1029 0.5179 0.1698 0.0757 1.0000 0.1305 -0.2379 0.2288 0.7833 0.1602

0.3260 0.3059 0.4208 -0.1369 0.2630 0.1305 1.0000 0.0905 -0.0117 0.2619 0.1829

0.5022 0.2603 0.0627 0.2878 0.3682 -0.2379 0.0905 1.0000 0.1594 0.1809 0.2989

0.4484 0.1866 0.2635 -0.0462 0.4893 0.2288 -0.0117 0.1594 1.0000 0.4278 -0.0967

0.8149 0.1579 0.7306 0.3903 0.4748 0.7833 0.2619 0.1809 0.4278 1.0000 0.4337

0.5483 0.0592 0.4727 0.3319 0.3121 0.1602 0.1829 0.2989 -0.0967 0.4337 1.0000

P =

1.0000 0.0148 0.0000 0.0025 0.0000 0.0563 0.0375 0.0008 0.0033 0.0000 0.0002

0.0148 1.0000 0.6198 0.5348 0.4790 0.5219 0.0518 0.1002 0.2427 0.3242 0.7130

0.0000 0.6198 1.0000 0.1923 0.0948 0.0005 0.0061 0.6968 0.0960 0.0000 0.0018

0.0025 0.5348 0.1923 1.0000 0.8328 0.2886 0.3933 0.0680 0.7741 0.0117 0.0340

0.0000 0.4790 0.0948 0.8328 1.0000 0.6379 0.0966 0.0179 0.0012 0.0017 0.0470

0.0563 0.5219 0.0005 0.2886 0.6379 1.0000 0.4162 0.1342 0.1502 0.0000 0.3169

0.0375 0.0518 0.0061 0.3933 0.0966 0.4162 1.0000 0.5738 0.9419 0.0981 0.2523

0.0008 0.1002 0.6968 0.0680 0.0179 0.1342 0.5738 1.0000 0.3195 0.2577 0.0577

0.0033 0.2427 0.0960 0.7741 0.0012 0.1502 0.9419 0.3195 1.0000 0.0053 0.5477

0.0000 0.3242 0.0000 0.0117 0.0017 0.0000 0.0981 0.2577 0.0053 1.0000 0.0046

0.0002 0.7130 0.0018 0.0340 0.0470 0.3169 0.2523 0.0577 0.5477 0.0046 1.0000

PCA

>> data2 = [b c1 d e_log10];

>> coeff = pca(data2)

coeff =

-0.0859 0.9875 -0.1311 -0.0154

0.0969 0.1376 0.9826 -0.0791

0.9916 0.0722 -0.1071 0.0096

-0.0032 0.0255 0.0770 0.9967

wcoeff =

0.4113 -0.8813 1.0945 0.1852

0.7044 0.1926 0.0090 -0.7012

0.6979 1.8072 0.9883 1.2100

0.1631 -0.0769 -0.1471 0.1409

latent =

1.3436

1.1497

0.8646

0.6420

explained =

33.5912

28.7430

21.6160

16.0497

[coeff,score,latent] = pca(data2)

coeff =

-0.0859 0.9875 -0.1311 -0.0154

0.0969 0.1376 0.9826 -0.0791

0.9916 0.0722 -0.1071 0.0096

-0.0032 0.0255 0.0770 0.9967

score =

1.4306 -1.0917 -0.4476 0.2682

-2.5369 -0.2768 0.6930 0.0000

-1.4273 -1.1531 1.0190 -0.2218

1.3464 -0.1180 -0.6206 -0.2895

0.4397 -1.1700 -0.3592 0.0164

2.4217 0.0783 0.1405 -0.1732

-1.7171 1.7704 0.3237 -0.0212

0.2894 -0.2598 -1.0925 0.5280

3.3296 0.0263 -0.8348 -0.2703

-2.7713 0.5121 -0.8996 0.5185

-0.5518 -1.2422 -0.2522 0.0068

-0.5524 -1.2377 -0.2386 0.1823

-0.9717 1.4808 -2.3243 -0.2062

0.4109 1.0080 0.8281 -0.1311

3.3519 -1.0462 -1.3290 -0.0279

5.4823 -0.6927 -0.0497 -0.1290

-1.4038 -0.0035 2.0222 -0.1060

-2.4540 -0.1619 1.5238 -0.1640

0.4968 0.0205 0.9592 -0.1157

1.3683 -1.1873 -1.1052 0.0774

0.3772 -1.2627 -1.0077 -0.0567

4.6137 -0.5835 1.3292 -0.0185

4.4061 -0.8814 -0.7876 0.0548

0.4391 -0.0705 0.3411 -0.3678

-0.7241 0.7374 -0.5008 0.1515

-3.9455 1.2567 -2.0262 -0.5350

-3.6519 0.5853 0.2886 0.0056

-2.4863 -1.3354 0.3899 -0.6506

3.2431 1.0183 -0.9523 -0.1102

-0.4948 -0.0516 1.0662 -0.1253

1.6188 -0.8225 1.4680 0.1722

-3.5903 -1.5419 -0.5511 0.2718

-3.5275 -1.4510 0.0923 0.2781

-2.5757 -0.3195 0.3446 0.4443

3.5158 0.3118 1.1302 0.2725

-2.5340 -1.3942 -0.0612 -0.3124

-3.6986 0.5189 -0.1856 0.0438

0.9320 7.0762 0.4149 -0.0090

0.4336 1.0523 1.1021 0.2459

0.1809 1.8027 -0.7219 0.3668

1.4876 0.0989 0.8708 0.1361

latent =

6.2769

2.1691

0.9577

0.0673

Xcentered = score*coeff'

Xcentered =

-1.1463 -0.4727 1.3902 0.2005

-0.1463 0.3971 -2.6098 0.0544

-1.1463 0.7218 -1.6098 -0.1675

-0.1463 -0.4727 1.3902 -0.3436

-1.1463 -0.4727 0.3902 -0.0425

-0.1463 0.3971 2.3902 -0.1675

1.8537 0.3971 -1.6098 0.0544

-0.1463 -1.1229 0.3902 0.4346

-0.1463 -0.4727 3.3902 -0.3436

0.8537 -1.1229 -2.6098 0.4694

-1.1463 -0.4727 -0.6098 -0.0425

-1.1463 -0.4727 -0.6098 0.1336

1.8537 -2.1577 -0.6098 -0.3436

0.8537 1.0025 0.3902 -0.0425

-1.1463 -1.1229 3.3902 -0.1675

-1.1463 0.3971 5.3902 -0.1675

-0.1463 1.8589 -1.6098 0.0544

-0.1463 1.2503 -2.6098 -0.0425

-0.1463 1.0025 0.3902 -0.0425

-1.1463 -1.1229 1.3902 -0.0425

-1.1463 -1.1229 0.3902 -0.1675

-1.1463 1.6740 4.3902 0.0544

-1.1463 -0.4727 4.3902 -0.0425

-0.1463 0.3971 0.3902 -0.3436

0.8537 -0.4727 -0.6098 0.1336

1.8537 -2.1577 -3.6098 -0.6446

0.8537 0.0100 -3.6098 0.0544

-1.1463 0.0100 -2.6098 -0.6446

0.8537 -0.4727 3.3902 -0.1675

-0.1463 1.0025 -0.6098 -0.0425

-1.1463 1.4724 1.3902 0.2585

-1.1463 -1.1229 -3.6098 0.2005

-1.1463 -0.4727 -3.6098 0.2585

-0.1463 0.0100 -2.6098 0.4694

-0.1463 1.4724 3.3902 0.3554

-1.1463 -0.4727 -2.6098 -0.3436

0.8537 -0.4727 -3.6098 0.0544

6.8537 1.4724 1.3902 0.2005

0.8537 1.2503 0.3902 0.3554

1.8537 -0.4727 0.3902 0.3554

-0.1463 1.0025 1.3902 0.2005

>> biplot(coeff(:,1:2),'scores',score(:,1:2),'varlabels',{'C_H','C_S','C_A','C_F'});


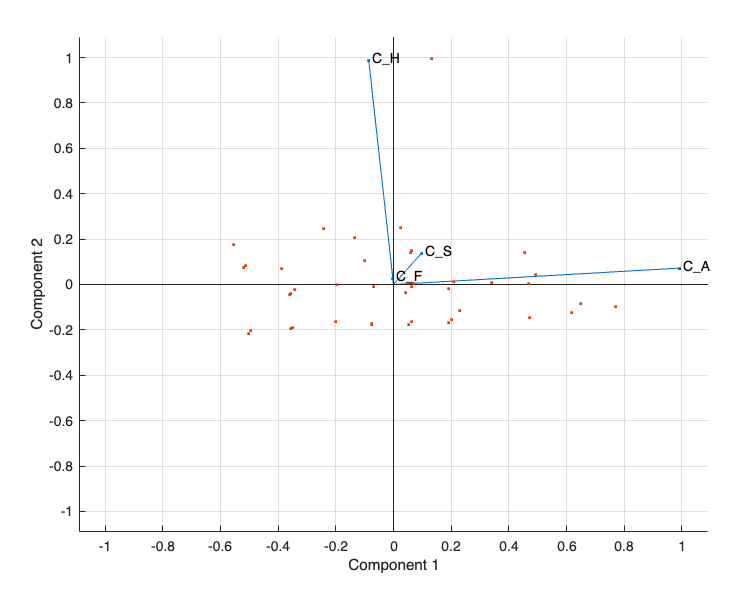


MANOVA/ANOVA

>> a = xlsread("Anova DANVA_SDQ.xlsx",'A2:A41');

b = xlsread("Anova DANVA_SDQ.xlsx",'B2:B41');

c = xlsread("Anova DANVA_SDQ.xlsx",'C2:C41');

Y = [b c];

>> [p, tbl, stats] = manova1(Y, a)

p =

1

tbl =

3.2340e-07

stats =

[**struct**](about:blank) with fields:

W: [2x2 double]

B: [2x2 double]

T: [2x2 double]

dfW: 38

dfB: 1

dfT: 39

lambda: 0.4458

chisq: 29.8887

chisqdf: 2

eigenval: [2x1 double]

eigenvec: [2x2 double]

canon: [40x2 double]

mdist: [40x1 double]

gmdist: [2x2 double]

gnames: {2x1 cell}


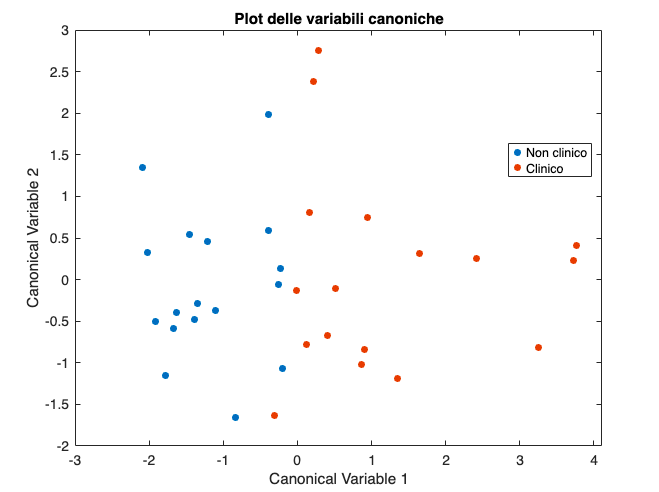


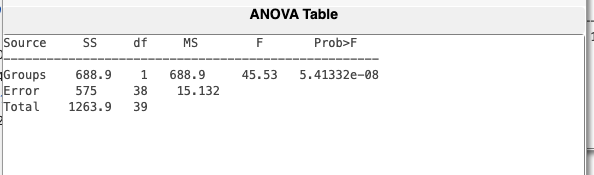

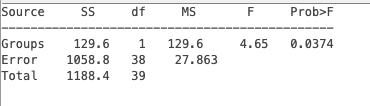


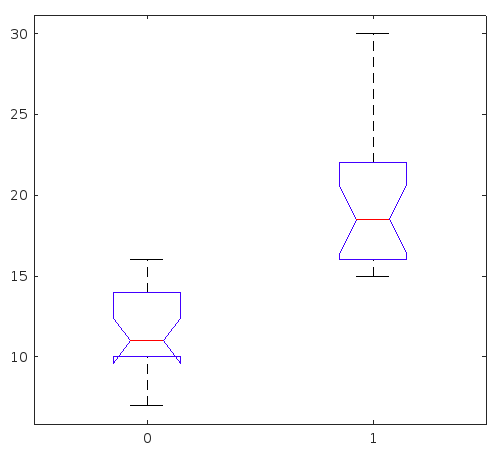


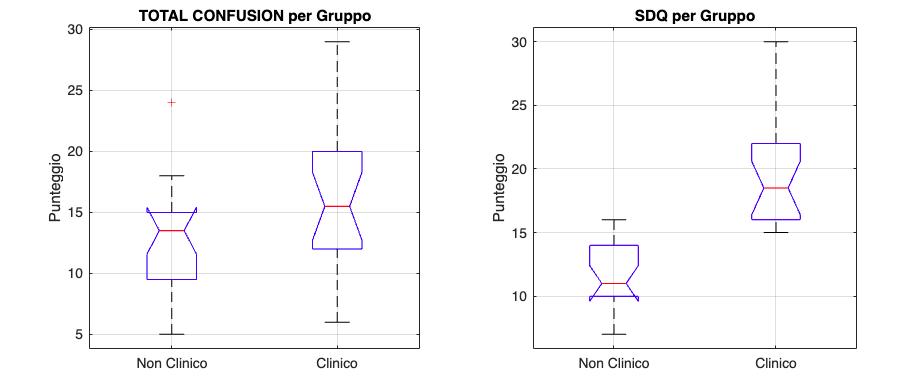


Data including paralanguage scale and normality test

> swtest(e)

ans =

[**logical**](about:blank)

0

>> f1 = boxcox(f);

>> swtest(f1)

ans =

[**logical**](about:blank)

0

>> swtest(g)

ans =

[**logical**](about:blank)

1

>> g1 = boxcox(g);

>> swtest(g)

ans =

[**logical**](about:blank)

1

>> data = [a b c d e f g h i j k l m n];

>> [R,P] = corrcoef(data)

R =

a1.0000 0.3781 0.6893 0.4595 0.6253 -0.1102 -0.0125 -0.1656 0.3259 0.3260 0.5022 0.4484 0.8149 0.5483

0.3781 b1.0000 0.1445 -0.0998 0.1478 0.2983 0.1123 0.2535 -0.1222 0.3059 0.2603 0.1866 0.1579 0.0592

0.6893 0.1445 c1.0000 0.2034 0.1346 -0.2911 -0.1205 -0.2798 0.5460 0.3835 0.0786 0.2940 0.7599 0.4409

0.4595 -0.0998 0.2034 d1.0000 -0.1143 -0.2072 -0.0767 -0.1599 0.1819 -0.1369 0.2878 -0.0462 0.3903 0.3319

0.6253 0.1478 0.1346 -0.1143 e1.0000 0.0761 0.0875 -0.0466 0.0238 0.2119 0.4604 0.4851 0.4013 0.2963

-0.1102 0.2983 -0.2911 -0.2072 0.0761 f1.0000 0.5638 0.6563 -0.3311 -0.0258 0.0542 -0.1130 -0.2688 -0.1239

-0.0125 0.1123 -0.1205 -0.0767 0.0875 0.5638 g1.0000 -0.1216 -0.0085 -0.0661 -0.0010 -0.0450 -0.0066 0.0705

-0.1656 0.2535 -0.2798 -0.1599 -0.0466 0.6563 -0.1216 h1.0000 -0.3519 -0.0191 0.0587 -0.1126 -0.3207 -0.1583

0.3259 -0.1222 0.5460 0.1819 0.0238 -0.3311 -0.0085 -0.3519 i1.0000 0.0921 -0.1992 0.2388 0.8126 0.1598

0.3260 0.3059 0.3835 -0.1369 0.2119 -0.0258 -0.0661 -0.0191 0.0921 j1.0000 0.0905 -0.0117 0.2619 0.1829

0.5022 0.2603 0.0786 0.2878 0.4604 0.0542 -0.0010 0.0587 -0.1992 0.0905 k1.0000 0.1594 0.1809 0.2989

0.4484 0.1866 0.2940 -0.0462 0.4851 -0.1130 -0.0450 -0.1126 0.2388 -0.0117 0.1594 1.0000 0.4278 -0.0967

0.8149 0.1579 0.7599 0.3903 0.4013 -0.2688 -0.0066 -0.3207 0.8126 0.2619 0.1809 0.4278 1.0000 0.4337

0.5483 0.0592 0.4409 0.3319 0.2963 -0.1239 0.0705 -0.1583 0.1598 0.1829 0.2989 -0.0967 0.4337 1.0000

P =

1.0000 0.0148 0.0000 0.0025 0.0000 0.4930 0.9383 0.3008 0.0376 0.0375 0.0008 0.0033 0.0000 0.0002

0.0148 1.0000 0.3674 0.5348 0.3563 0.0582 0.4847 0.1098 0.4466 0.0518 0.1002 0.2427 0.3242 0.7130

0.0000 0.3674 1.0000 0.2022 0.4013 0.0648 0.4529 0.0764 0.0002 0.0133 0.6253 0.0621 0.0000 0.0039

0.0025 0.5348 0.2022 1.0000 0.4768 0.1936 0.6336 0.3181 0.2550 0.3933 0.0680 0.7741 0.0117 0.0340

0.0000 0.3563 0.4013 0.4768 1.0000 0.6361 0.5865 0.7723 0.8826 0.1834 0.0025 0.0013 0.0093 0.0600

0.4930 0.0582 0.0648 0.1936 0.6361 1.0000 0.0001 0.0000 0.0345 0.8728 0.7362 0.4817 0.0893 0.4402

0.9383 0.4847 0.4529 0.6336 0.5865 0.0001 1.0000 0.4487 0.9579 0.6813 0.9949 0.7800 0.9676 0.6616

0.3008 0.1098 0.0764 0.3181 0.7723 0.0000 0.4487 1.0000 0.0241 0.9055 0.7155 0.4833 0.0409 0.3228

0.0376 0.4466 0.0002 0.2550 0.8826 0.0345 0.9579 0.0241 1.0000 0.5670 0.2117 0.1327 0.0000 0.3184

0.0375 0.0518 0.0133 0.3933 0.1834 0.8728 0.6813 0.9055 0.5670 1.0000 0.5738 0.9419 0.0981 0.2523

0.0008 0.1002 0.6253 0.0680 0.0025 0.7362 0.9949 0.7155 0.2117 0.5738 1.0000 0.3195 0.2577 0.0577

0.0033 0.2427 0.0621 0.7741 0.0013 0.4817 0.7800 0.4833 0.1327 0.9419 0.3195 1.0000 0.0053 0.5477

0.0000 0.3242 0.0000 0.0117 0.0093 0.0893 0.9676 0.0409 0.0000 0.0981 0.2577 0.0053 1.0000 0.0046

0.0002 0.7130 0.0039 0.0340 0.0600 0.4402 0.6616 0.3228 0.3184 0.2523 0.0577 0.5477 0.0046 1.0000
