# Supplementary material for: Multisensory Learning of Socio-Emotional Skills: Linking Emotion Confusion to Behavioral Outcomes in Schools
Source: Research Square preprint supplement (doi:10.21203/rs.3.rs-7133079/v1), 2025-07-22
Supplement: Supplementary file 3 [file data.xlsx]

## Sheet: Foglio1
TOTAL CONFUSION	SUBSCALE CONFUSION FELICITA'	SUBSCALE CONFUSION TRISTEZZA	SUBSCALE CONFUSION RABBIA	SUBSCALE CONFUSION PAURA	Total Paralanguage Confusion	Adult Paralanguage	Child Paralanguage	SDQ	EMOTIONAL PROBLEMS SCALE 1	CONDUCT PROBLEMS SCALE 2	HYPERACTIVITY SCALE 3	PEER PROBLEMS SCALE 4	PROSOCIAL SCALE 5
15	0	2	7	6	10	4	6	10	0	2	1	25	3
12	1	4	3	4	11	7	4	20	3	1	1	33	3
11	0	5	4	2	8	3	5	20	0	1	2	31	2
11	1	2	7	1	9	6	8	17	0	3	1	28	5
11	0	2	6	3	11	8	3	11	1	1	2	22	2
15	1	4	8	2	6	2	4	11	2	4	1	26	6
15	3	4	4	4	12	5	7	11	2	5	2	26	1
19	1	1	6	11	15	7	8	16	0	7	2	35	4
13	1	2	9	1	12	5	6	8	0	6	0	21	5
18	2	1	3	12	9	5	4	7	0	8	2	25	3
10	0	2	5	3	11	5	6	11	2	1	0	21	1
12	0	2	5	5	8	4	4	18	2	4	0	30	3
9	3	0	5	1	14	6	8	9	0	2	1	18	1
17	2	6	6	3	12	6	6	14	0	0	1	32	4
12	0	1	9	2	12	4	8	18	0	1	0	30	5
17	0	4	11	2	8	5	3	14	0	5	0	31	9
19	1	10	4	4	11	6	5	22	2	2	2	41	6
14	1	7	3	3	9	4	5	15	0	1	0	29	5
16	1	6	6	3	9	4	5	29	2	1	0	45	3
11	0	1	7	3	9	3	6	12	0	0	1	23	1
9	0	1	6	2	8	3	5	16	0	0	2	25	0
23	0	9	10	4	8	6	2	30	0	3	2	53	4
15	0	2	10	3	10	4	6	15	0	1	2	30	2
12	1	4	6	1	7	3	4	20	0	2	2	32	2
14	2	2	5	5	11	5	6	16	0	3	1	30	5
5	3	0	2	0	10	4	6	14	0	2	1	19	0
11	2	3	2	4	11	5	6	22	0	1	5	33	1
6	0	3	3	0	11	4	7	16	1	0	0	22	2
15	2	2	9	2	11	6	5	18	0	5	2	33	0
15	1	6	5	3	7	3	4	15	2	2	2	30	3
22	0	8	7	7	8	4	4	30	0	2	4	52	5
9	0	1	2	6	9	3	6	10	0	1	3	19	1
11	0	2	2	7	10	4	6	15	1	3	1	26	3
19	1	3	3	12	12	5	7	16	2	2	2	35	6
27	1	8	9	9	9	4	5	15	1	6	4	43	3
6	0	2	3	1	13	7	6	10	0	0	1	16	2
10	2	2	2	4	11	7	4	10	0	1	1	20	4
29	8	8	7	6	12	4	8	15	3	4	2	44	5
24	2	7	6	9	10	3	7	13	2	6	4	38	6
20	3	2	6	9	9	7	2	19	1	1	3	40	5
20	1	6	7	6	7	5	2	25	1	2	2	45	5
